# Supplementary material
Source: Springer Nature journal article supplement (https://www.springermedizin.de/resource/supplementary/13012_2010_343_MOESM3_ESM.pdf/9629810)
Supplement: MOESM3 [file 9629810]

## **Acquisition and management of knowledge**

- Training
- National Guidelines<sup>1</sup>
- Interaction with colleagues
- Other channels
- Level of knowledge and skills
- Integration of knowledge and practice

## **Traditional medicine**

- Professional beliefs and use
- Presence in general population

## **Healthcare context**

- Healthcare structure
- Geographic location
- Number of patients
- Data management/reporting
- Availability of material resources
- Commitment
